# Supplementary material
Source: MDPI journal article supplement (https://www.mdpi.com/2079-6412/12/5/636)
Supplement: s1 [file s1]

# Application of Advanced Analytical Techniques in Organic Cultural Heritage: A Case Study of Ancient Architecture Relics in the Palace Museum (Beijing)

Le Wei <sup>1,\*</sup>, Yue Ma <sup>1</sup>, Zhimou Guo <sup>2,3</sup>, Junjie Ding <sup>3</sup>, Gaowa Jin <sup>2,3,\*</sup>, An Gu <sup>1</sup> and Yong Lei <sup>1,\*</sup>

<sup>1</sup> Conservation Department, The Palace Museum, Beijing 100009, China; mayue\_cc@hotmail.com (Y.M.); gu.an@outlook.com (A.G.)

<sup>2</sup> CAS Key Laboratory of Separation Sciences for Analytical Chemistry, Dalian Institute of Chemical Physics, Chinese Academy of Sciences, Dalian 116023, China; guozhimou@dicp.ac.cn

<sup>3</sup> Ganjiang Chinese Medicine Innovation Center, Nanchang 330000, China; dingjunjie@dicp.ac.cn

\* Correspondence: lelewendy@gmail.com (L.W.); jingw@dicp.ac.cn (G.J.); leiyong@dpm.org.cn (Y.L.)

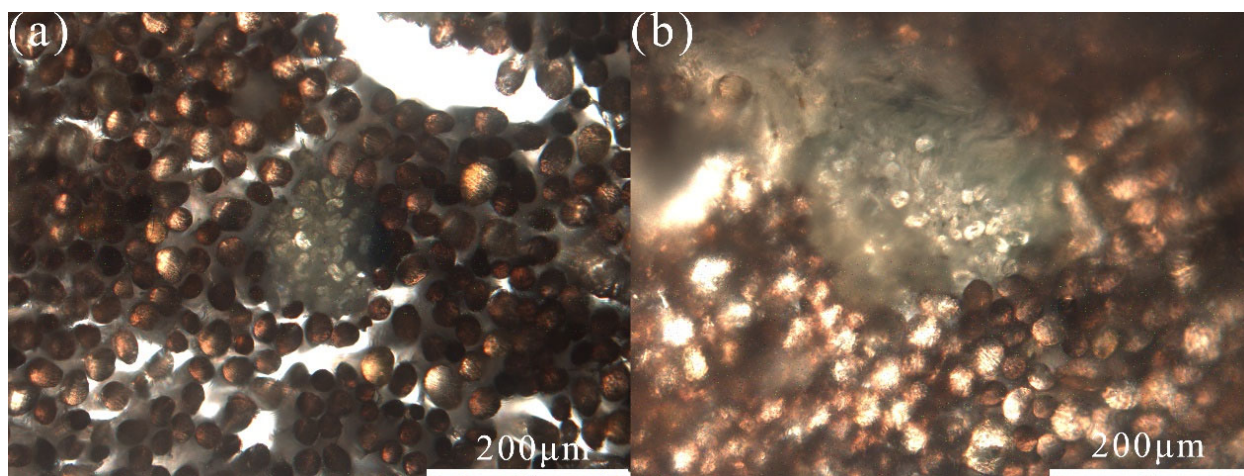

**Figure S1.** Fiber cross-sections obtained from the layer No. 2 (a) (20×) and No. 4 (b) (20×) respectively, presenting stained lumen and periphery of cotton fibers.

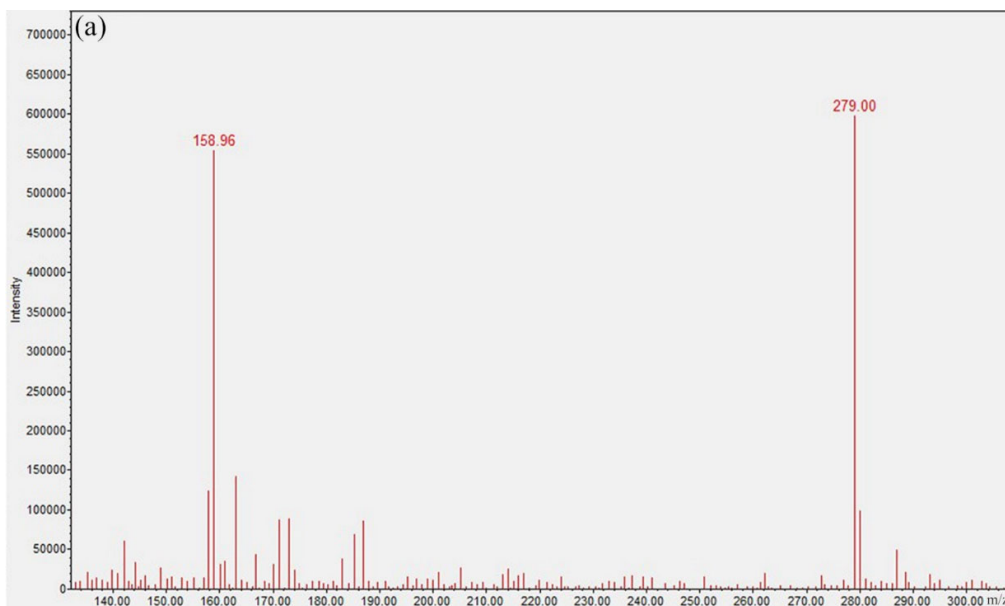

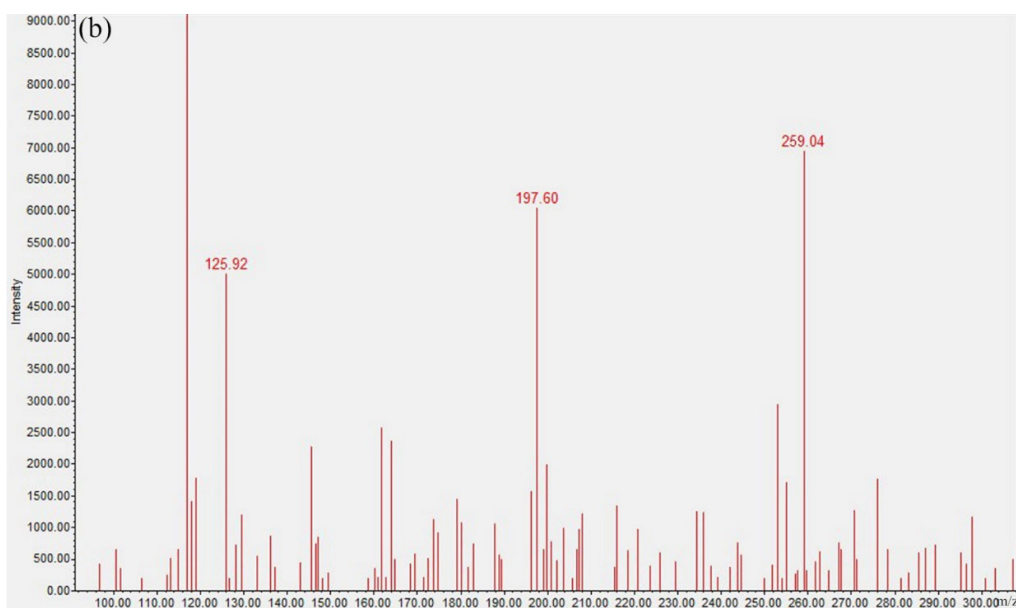

**Figure S2.** MS spectra of cotton fiber with the molecular ion peak at  $m/z$  279 (a) and 259 (b) in positive and negative ion mode respectively.

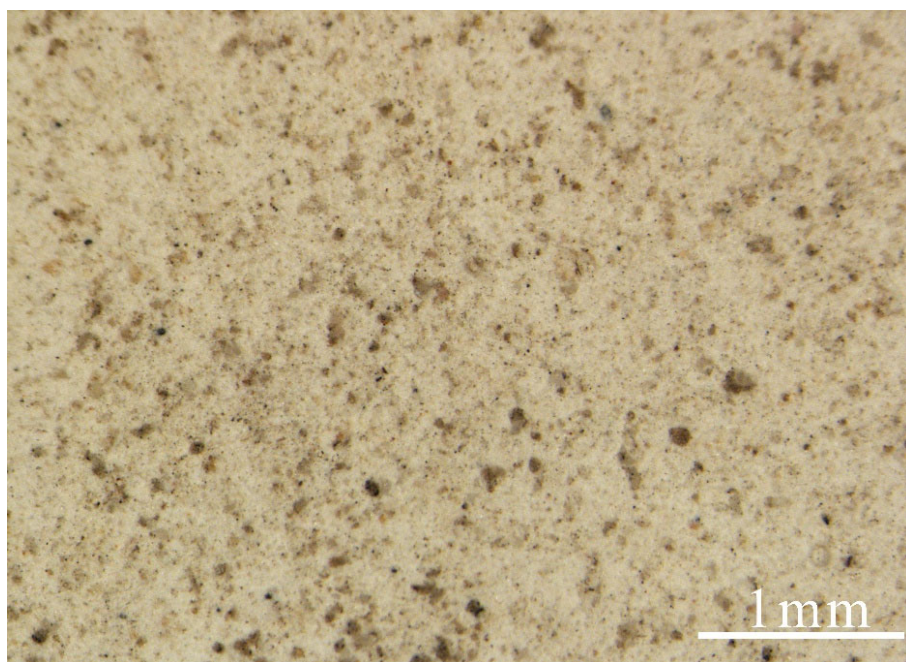

**Figure S3.** Microscopic observation of the surface white pigments (32 $\times$ ).

**Table S1.** The colorimetric characterization of printed fabric.

| Colors | L     | a      | b     |
|--------|-------|--------|-------|
| Green  | 81.47 | -12.52 | 13.08 |
| Blue   | 64.90 | -2.62  | -5.82 |
| Cyan   | 83.66 | -5.95  | 6.60  |
| Red    | 60.22 | 38.30  | 20.18 |
| White  | 94.18 | -0.60  | 14.85 |
